# Supplementary material for: The Gelation of CAG Repeat Expansion RNAs Suppresses Global Protein Translation
Source: Research Square preprint supplement (doi:10.21203/rs.3.rs-541829/v1), 2021-06-07
Supplement: Supplementary file 1 [file 5b2e9304cac7ff9057934228.pdf]

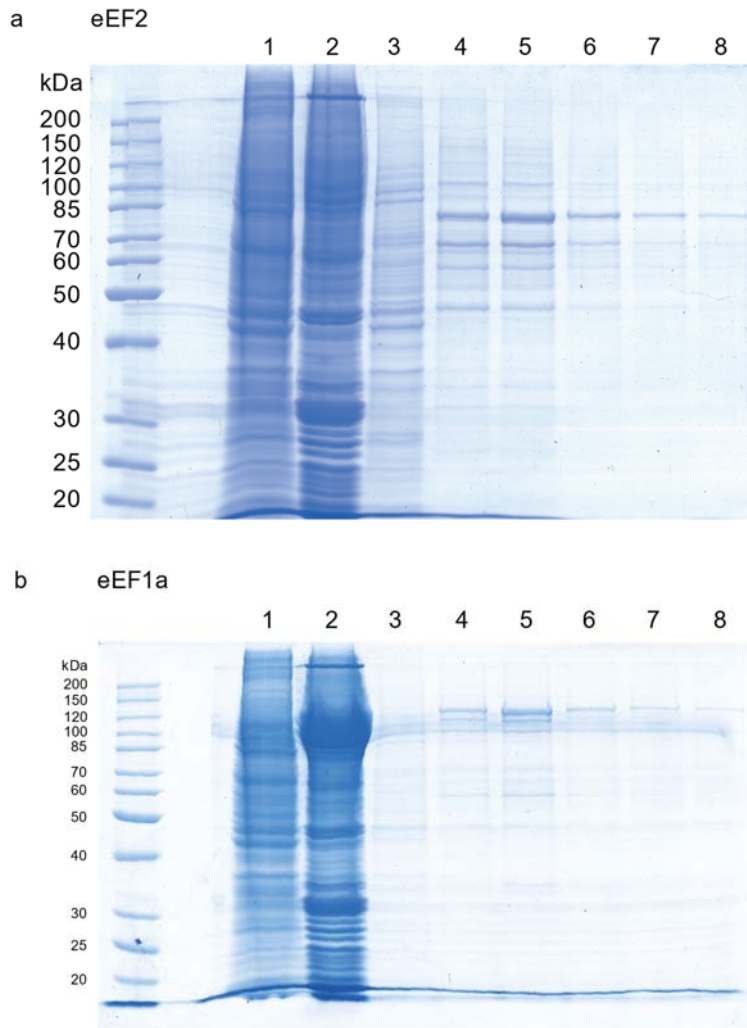

**Extended Data Fig. 1 Coomassie staining of recombinant protein purification samples.** **a.** SDS-PAGE analysis and Coomassie staining of the expression and purification samples of the recombinant eEF2 protein: lane 1, the whole cell lysate after ultrasonic treatment; lane 2, the supernatants of cell lysate after centrifuge; lane 3, the flow through fraction of Ni-NTA chromatography; lane 4-8, the eluates of Ni-NTA chromatography (eEF2-sfGFP-His8); Lane 6-8 were collected for further experiments. **b.** Similar to a, but for the recombinant purified eEF1a protein.
