# Supplementary material for: The Gelation of CAG Repeat Expansion RNAs Suppresses Global Protein Translation
Source: Research Square preprint supplement (doi:10.21203/rs.3.rs-541829/v1), 2021-06-07
Supplement: Supplementary file 1 [file a59fcee4be42aa87bac07a3d.xlsx]

## Sheet: Sheet1
Supplementary Table 1
Plasmid sequences
Construct	Sequence
25xCAG	TTTCGCAACGGGTTTGCCGCCAGAACACAGGATCGCTAGCGGATCCTAGCTAGGTAACTAAGTAACTAGCATCATCACCATCACCATCAGCAGCAGCAGCAGCAGCAGCAGCAGCAGCAGCAGCAGCAGCAGCAGCAGCAGCAGCAGCAGCAGCAGCAGCAGTGAGACGTCGACCTGAGGTAATTATAACCCGGGCCCTATATATCGATCC
72xCAG	TTTCGCAACGGGTTTGCCGCCAGAACACAGGATCGCTAGCGGATCCTAGCTAGGTAACTAAGTAACTAGCATCATCACCATCACCATCAGCAGCAGCAGCAGCAGCAGCAGCAGCAGCAGCAGCAGCAGCAGCAGCAGCAGCAGCAGCAGCAGCAGCAGCAGCAGCAGCAGCAGCAGCAGCAGCAGCAGCAGCAGCAGCAGCAGCAGCAGCAGCAGCAGCAGCAGCAGCAGCAGCAGCAGCAGCAGCAGCAGCAGCAGCAGCAGCAGCAGCAGCAGCAGCAGCAGCAGCAGCAGCAGCAGCAGTGAGACGTCGACCTGAGGTAATTATAACCCGGGCCCTATATATCGATCC
Poly Cys	GGATCCGCCACCATGTGTTGTTGTTGTTGTTGTTGTTGTTGTTGTTGTTGTTGTTGTTGTTGTTGTTGTTGTTGTTGTTGTTGTTGTTGTTGTTGTTGTTGTTGTTGTTGTTGTTGTTGTTGTTGTTGTTGTTGTTGTTGTTGTTGTTGTTGTTGTTGTTGTTGTTGTTGTTGTTGTTGTTGTTGTTGTTGTTGTTGTTGTTGTTGTTGTTGTTGTTGTTGTTGTTGTTGTTACCCATACGACGTCCCAGACTACGCTTAGGAATTC
Poly Ser	GGATCCGCCACCATGTCTTCCTCTTCCTCTTCCTCTTCCTCTTCCTCTTCCTCTTCCTCTTCCTCTTCCTCTTCCTCTTCCTCTTCCTCTTCCTCTTCCTCTTCCTCTTCCTCTTCCTCTTCCTCTTCCTCTTCCTCTTCCTCTTCCTCTTCCTCTTCCTCTTCCTCTTCCTCTTCCTCTTCCTCTTCCTCTTCCTCTTCCTCTTCCTCTTCCTCTTCCTCTTCCTCTTCCTCTTCCGATTACAAGGATGACGACGATAAGTAGGAATTC
Poly Glu	GGATCCATGTTCCAACAGCAGCAACAGCAACAACAGCAGCAACAGCAACAACAGCAGCAACAGCAACAACAGCAGCAACAACAGCAGCAACAGCAACAACAGCAGCAACAGCAACAACAGCAGCAGCAGCAACAACAGCAGCAACAGCAACAACAACAGCAGCAACAGCAACAACAGCAGCAACAGCAACAACAGCAGCAACAGCAACAACAGCAGCAACAGCAACAACCGCCACCATGAACCGGT
Antisense oligos for transfection
8xCTG	C*T*G*C*T*G*C*T*G*C*T*G*C*T*G*C*T*G*C*T*G*C*T*G
	*denotes phosphorothioate bonds
FISH probes
CAG probe	C*TGC*TGC*TGCTG*CTG*CTG*CT
	*denotes LNA-modifie
Antisense oligos for transfection
8xCTG	C*T*G*C*T*G*C*T*G*C*T*G*C*T*G*C*T*G*C*T*G*C*T*G
	*denotes phosphorothioate bonds
RT PCR primers
mHprt-F	mouse	GTCAACGGGGGACATAAAAG
mHprt-R	mouse	CAACAATCAAGACATTCTTTCCA
mHtt-F	mouse	CTGCACGGCATCCTCTATGT
mHtt-R	mouse	TGTTCACGCAGTGGGCTATT
HTT-F(N)	human	CCTTTTTGAAGCAGCCCGTG
HTT-R(N)	human	TGCAGCATCCCCAAACAGAT
m7sk-F	mouse	TCCATTGTAGGAGAACGTAGGG
m7sk-R	mouse	AGCGCCTCATTTGGATGT
m18s-F	mouse	GCCGCTAGAGGTGAAATTCTT
m18s-R	mouse	CGTCTTCGAACCTCCGACT
m28s-F	mouse	GGGTTTAGACCGTCGTGAGA
m28s-R	mouse	AGCCAAGCACATACACCAAA
m45s-F	mouse	CCCACACGTGTCTCGTTTC
m45s-R	mouse	CAGATGGACCGAGGGGTAG
mLAMP2-F	mouse	GAGCAGGTGCTTTCTGTGTCTAG
mLAMP2-R	mouse	GCCTGAAAGACCAGCACCAACT
siRNA
EEF2 siRNA	GCGCCAUCAUGGACAAGAAUUTT
Lamp2 siRNA-1	GGCUGAACAACAGCCAAAUTT
Lamp2 siRNA-2	CCCUCUGGGAAGUUCUUAUTT
Lamp2 siRNA-3	GGGAGAUGAAUUUCACAAUTT
mHTT siRNA	CAUUGUGAAUCACAUUCAATT
